# Supplementary material
Source: HighWire-hosted journal article supplement (https://jitc.bmj.com/content/9/3/e001803)
Supplement: inline-supplementary-material-6 [file inline-supplementary-material-6.pdf]

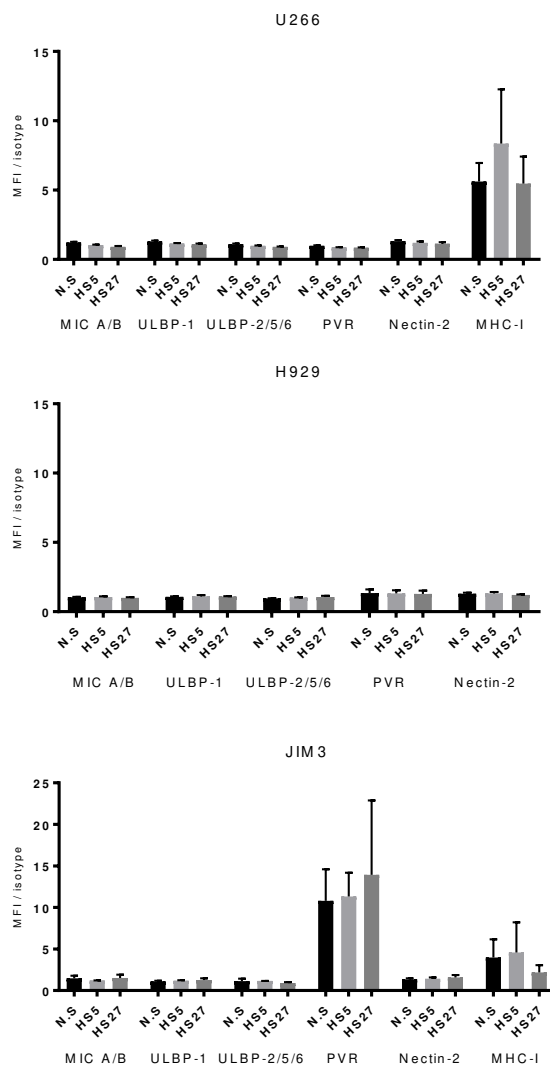

**Supplementary Figure 6: NK cell activatory ligands do not change following co-culture with BMSCs.** U266B, H929 and JIM3 were either cultured alone or co-cultured with HS5 or HS27 BMSCs for 48hrs and the expression of NK cell activatory ligands was determined by flow cytometry. Error bars show the mean of at least n=2 independent experiments.
